# Supplementary material
Source: PubMed Central journal article supplement (PMC3232606)
Supplement: supp_jc.2011-1567_11-1567_Supplementary_tables_1_and_2_JCEM.pdf [file supp_jc.2011-1567_11-1567_Supplementary_tables_1_and_2_JCEM.pdf]

**Table 1S. Primer Sequences for Gene Expression Studies**

| <b>Gene name</b> | <b>Forward primer (5' to 3')</b> | <b>Reverse primer (5' to 3')</b> |
|------------------|----------------------------------|----------------------------------|
| 18S              | TTCGAACGTCTGCCCTATCAA            | ATGGTAGGCACGGCGACTA              |
| CD31             | GGTCTGAGGGTGAAGGTGA              | TTGCAGCACAATGTCCTCTC             |
| VEGF             | TTTGCCAATCACACTTCCTG             | TTGTTCGCTGCCTGACAC               |
| HIF1 $\alpha$    | TGCTCATCAGTTGCCACTTC             | CAAATCACCAGCATCCAGAA             |
| Collagen1a       | TACAGCGTC ACTGTCGATGGC           | TCAATCACTGTCTTGCCCCAG            |
| Collagen3a       | AATTTGGTGTGGACGTTGGC             | TTGTCGGTCACT TGC ACTGG           |
| Collagen4a       | CTACGTGCAAGGCAATGAACG            | GCAGAACAGGAAGGGCATTGT            |
| Collagen5a       | GATTGAGCAGATGAAACGGCC            | CCTTGGTTAGGATCGACCCAG            |
| Collagen6a       | GACCTCGGACCTGTTGGGTAC            | TACCCCATCTCCCCCTTCAC             |
| Collagen7a       | CATCTTCTCCCTGACGCCTG             | CGCACGGTGAGCATTTGTCT             |
| Collagen8a       | CGAGCCCGTGATGTACACG              | ACTGCCCCGGCATAACAGTCC            |
| Collagen10a      | GCCCAGCAGGAGCAAAGG               | GGACCGGGACTTCCTGGAT              |
| Elastin          | CCCGCAGTTACCTTTCCG               | CCAGGCTGAGGAACCAC                |

| Table 2S. Correlation coefficients between the mRNA levels of vascular and ECM markers, BMI and S <sub>1</sub> |        |                |
|----------------------------------------------------------------------------------------------------------------|--------|----------------|
|                                                                                                                | BMI    | S <sub>1</sub> |
| CD31                                                                                                           | 0.12   | -0.12          |
| VEGF                                                                                                           | 0.26*  | -0.09          |
| HIF1 $\alpha$                                                                                                  | -0.13  | 0.02           |
| Elastin                                                                                                        | 0.004  | -0.16          |
| Collagen I‡                                                                                                    | -0.16  | -0.03          |
| Collagen III‡                                                                                                  | 0.01   | -0.29          |
| Collagen IV‡                                                                                                   | 0.10   | -0.16          |
| Collagen V                                                                                                     | 0.19   | -0.34†         |
| Collagen VI                                                                                                    | 0.31†  | -0.33†         |
| Collagen VII‡                                                                                                  | -0.09  | 0.24           |
| Collagen VIII‡                                                                                                 | -0.004 | -0.17          |
| Collagen X‡                                                                                                    | -0.16  | 0.06           |

Real time RT-PCR was performed on the adipose tissue RNA from 74 subjects (except as indicated) covering a wide range of BMI and S<sub>1</sub>. S<sub>1</sub> was log transformed. \*p<0.05; †p<0.01, ‡n=40 subjects
